# Supplementary material for: Configurational Entropy Components and Their Contribution to Biomolecular Complex Formation
Source: PubMed Central journal article supplement (PMC9251725; doi:10.1021/acs.jctc.8b01254), 2019-05-01
Supplement: ct8b01254_si_001.pdf [file ct8b01254_si_001.pdf]

## Supplementary information:

# Configurational Entropy Components and Their Contribution to Biomolecular Complex Formation

Markus Fleck<sup>†,‡</sup> and Bojan Zagrovic<sup>\*,†</sup>

*†University of Vienna, Max F. Perutz Laboratories, Department of Structural and Computational Biology, Campus Vienna Biocenter 5, Vienna 1030, Austria.*

*‡University of Vienna, Faculty of Chemistry, Department of Computational Biological Chemistry, Währinger Straße 17, Vienna 1090, Austria*

E-mail: [bojan.zagrovic@univie.ac.at](mailto:bojan.zagrovic@univie.ac.at)

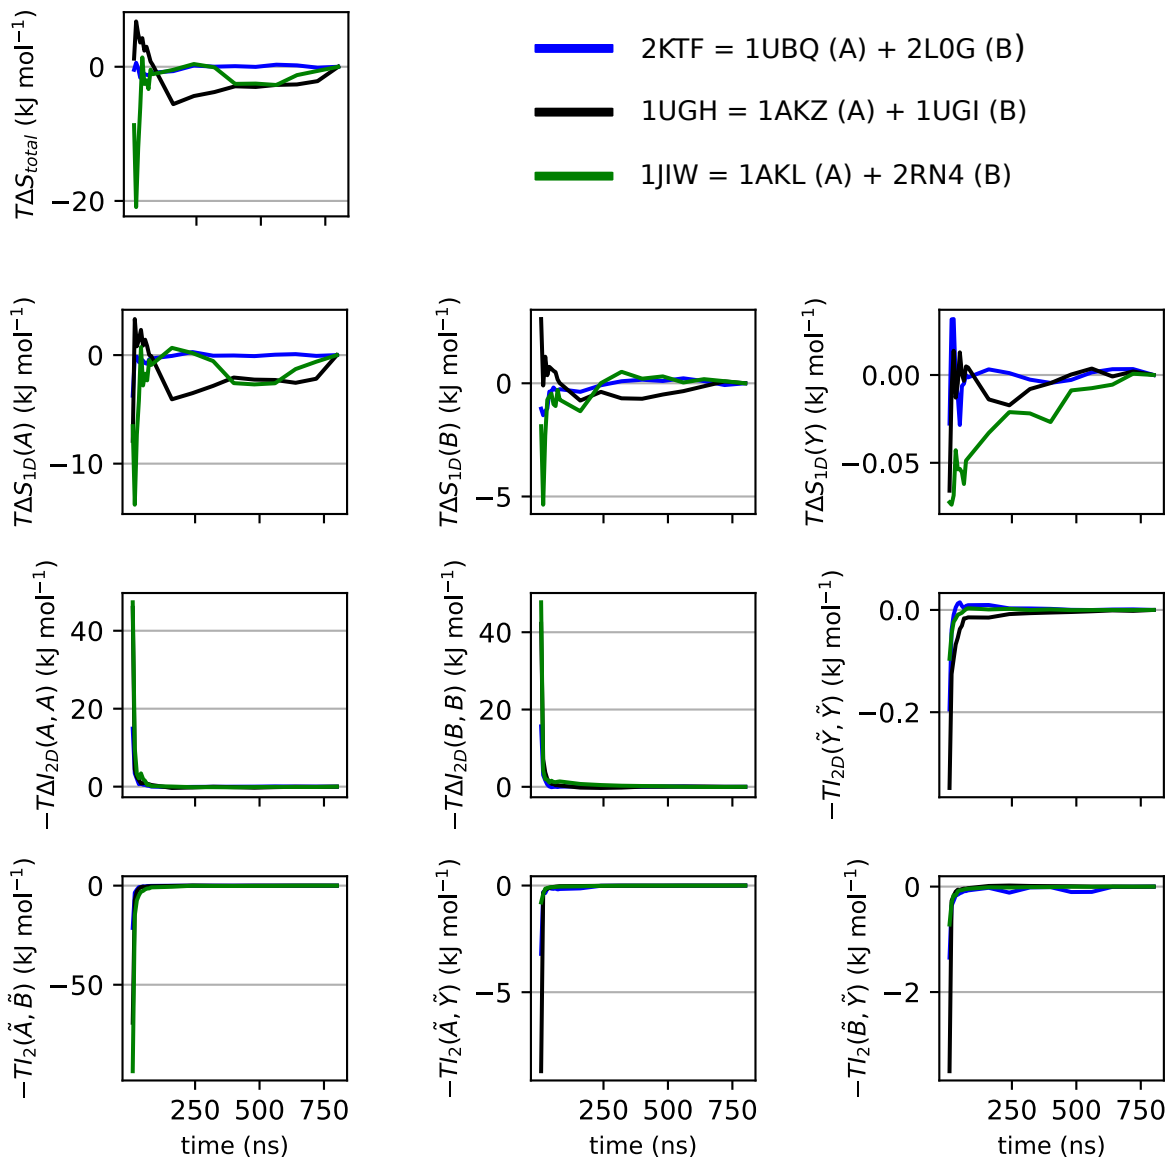

Figure 1: Convergence analysis of three representative complexes from shuffled trajectories. The analysis here is the same as in Figure 2 of the main article, but with the frames in the original trajectories shuffled randomly. By removing time ordering, this analysis captures convergence as a function of ensemble size (frames) as opposed to simulation time. Because the convergence with ensemble size is considerably more rapid, the first 80 ns have been fine-grained to 8 ns spacing of data points. The resolution of the trajectories is 1 ps.
